# Supplementary material for: Risk assessment of vegetables irrigated with arsenic-contaminated water
Source: Royal Society of Chemistry journal article supplement (doi:10.1039/c3em00218g), 2013-01-01
Supplement: c3em00218g.pdf [file c3em00218g.pdf]

**Table S1.** Laboratories where physical and chemical analysis of the Rangitikei Silt Loam soil were conducted

| Soil test                              | Laboratory                                                                                                                                                                                                                                                                                                                                                                                                                                                                           |
|----------------------------------------|--------------------------------------------------------------------------------------------------------------------------------------------------------------------------------------------------------------------------------------------------------------------------------------------------------------------------------------------------------------------------------------------------------------------------------------------------------------------------------------|
| pH, Olsen P, SO <sub>4</sub> , and CEC | <p>Fertilizer and Lime Research Centre laboratory, Massey University</p> <p>The laboratory follows “Total Quality Management” systems whereby the precision of all analysis is verified by the results of QC samples. The laboratory is a member of the Australasian Soil and Plant Analysis Council (ASPAC) and contributes to the New Zealand inter-laboratory comparison programme for soil, with six members either being commercial, government or university laboratories.</p> |
| Texture, Total C and Total N           | <p>The Landcare Research laboratory, accredited by International Accreditation New Zealand (IANZ).</p>                                                                                                                                                                                                                                                                                                                                                                               |
| Total Fe and Al                        | <p>Soil and Physical Sciences laboratory, Lincoln University</p> <p>Reference soil material (International Soil Analytical Exchange-ISE 921) from Wageningen University, The Netherlands, was analyzed for quality assurance which has a recoverable concentration of 91% to 108% of the certified value.</p>                                                                                                                                                                        |

**Table S2** Hazard Quotient (HQ) and Cancer Risk (CR) calculation

| Adults (> 18 years old)       |     |    |    |    |       |                                         |        |                 |     |                   |
|-------------------------------|-----|----|----|----|-------|-----------------------------------------|--------|-----------------|-----|-------------------|
| C                             | Fi  | Ef | Ed | W  | Te    | EDI (C x Fi<br>x Ef x Ed) /<br>(W x Te) | RfD    | HQ<br>(EDI/RfD) | CSF | CR<br>(EDI x CSF) |
| 0.080                         | 0.5 | 52 | 70 | 60 | 25550 | 0.000095                                | 0.0003 | 0.32            | 1.5 | 0.00014           |
| 0.106                         | 0.5 | 52 | 70 | 60 | 25550 | 0.000126                                | 0.0003 | 0.42            | 1.5 | 0.00019           |
| 0.122                         | 0.5 | 52 | 70 | 60 | 25550 | 0.000145                                | 0.0003 | 0.48            | 1.5 | 0.00022           |
| 0.319                         | 0.5 | 52 | 70 | 60 | 25550 | 0.000379                                | 0.0003 | 1.26            | 1.5 | 0.00057           |
| Adolescents (12-18 years old) |     |    |    |    |       |                                         |        |                 |     |                   |
| C                             | Fi  | Ef | Ed | W  | Te    | EDI (C x Fi<br>x Ef x Ed) /<br>(W x Te) | RfD    | HQ<br>(EDI/RfD) | CSF | CR<br>(EDI x CSF) |
| 0.080                         | 0.5 | 52 | 70 | 50 | 25550 | 0.000114                                | 0.0003 | 0.38            | 1.5 | 0.00017           |
| 0.106                         | 0.5 | 52 | 70 | 50 | 25550 | 0.000151                                | 0.0003 | 0.50            | 1.5 | 0.00023           |
| 0.122                         | 0.5 | 52 | 70 | 50 | 25550 | 0.000174                                | 0.0003 | 0.58            | 1.5 | 0.00026           |
| 0.319                         | 0.5 | 52 | 70 | 50 | 25550 | 0.000454                                | 0.0003 | 1.51            | 1.5 | 0.00068           |

C: Concentration of As in the edible part of the plant ( $\text{mg kg}^{-1}$  fresh weight)

Fi: Food intake rate (kg per person per day; assumed 0.5 kg)

Ef: Exposure frequency (days per year; assumed 52 days per year)

Ed: Exposure duration (equivalent to the average lifetime, about 70 years)

W: Average body weight (60 kg for an adult, and 50 kg for adolescents)

Te: Average exposure time ( $= \text{Ed} \times 365$  days)

EDI: Estimated daily intake ( $\text{mg kg}^{-1} \text{ day}^{-1}$ ) calculated as  $\text{EDI} = (\text{C} \times \text{Fi} \times \text{Ef} \times \text{Ed}) / (\text{W} \times \text{Te})$

RfD: Oral reference dose ( $0.0003 \text{ mg As kg}^{-1} \text{ body weight day}^{-1}$ )

HQ: Hazard Quotient (calculated as  $\text{HQ} = \text{EDI}/\text{RfD}$ )

CSF: Cancer slope factor for As ( $1.5 \text{ mg As kg}^{-1} \text{ day}^{-1}$ )

CR: Cancer risk (calculated as:  $\text{EDI} \times \text{CSF}$ )
